# Supplementary material for: An intein-cassette integration approach used for the generation of a split TEVprotease activated by conditional protein splicing
Source: Royal Society of Chemistry journal article supplement (doi:10.1039/c1mb05025g), 2011-04-12
Supplement: c1mb05025g.pdf [file c1mb05025g.pdf]

## **Electronic supplementary information (ESI)**

### **An intein-cassette integration approach**

**used for the generation of a split TEV protease activated by conditional protein splicing**

Tim Sonntag and Henning D. Mootz\*

Contribution from:

TU Dortmund University

Faculty of Chemistry – Chemical Biology

Otto-Hahn-Str. 6

44227 Dortmund

Germany

(\*) corresponding author (present address):

University of Muenster

Institute of Biochemistry

Wilhelm-Klemm-Str. 2

48149 Münster

Germany

Fax: +49-251-83-33007

E-mail: [Henning.Mootz@uni-muenster.de](mailto:Henning.Mootz@uni-muenster.de)

## Table of contents

|                                                                                                                                             |     |
|---------------------------------------------------------------------------------------------------------------------------------------------|-----|
| <b>Supplemental Figures</b> .....                                                                                                           | S3  |
| Figure S1. DNA-sequence of the CPS cassette .....                                                                                           | S3  |
| Figure S2. Positions of integration of the CPS cassette into the TEV protease .....                                                         | S4  |
| Figure S3. Influence of the incubation time and concentration of the small molecule on the protein<br><i>trans</i> -splicing reaction ..... | S5  |
| Figure S4: Amino acid sequence of the TEV constructs and reporter proteins.....                                                             | S6  |
| <b>Experimental Procedures</b> .....                                                                                                        | S7  |
| Small molecules.....                                                                                                                        | S7  |
| Western Blots.....                                                                                                                          | S7  |
| General yeast procedures .....                                                                                                              | S7  |
| Generation of a rapamycin-resistant yeast strain.....                                                                                       | S8  |
| Genetic insertion of the CPS intein cassette into target genes.....                                                                         | S8  |
| Identification and modification of the active TEV-CPS variants.....                                                                         | S9  |
| TEV-CPS mediated manipulation of EGFP localization and analysis by fluorescence microscopy .....                                            | S10 |
| .....                                                                                                                                       |     |
| Table S1. <i>S. cerevisiae</i> strains used in this study .....                                                                             | S12 |
| Table S2. List of generated plasmids.....                                                                                                   | S13 |
| Table S3. List of primers .....                                                                                                             | S15 |
| Table S4. Primers and plasmids for the integration of the CPS cassette into GST-TEV .....                                                   | S17 |
| <b>Supplemental References</b> .....                                                                                                        | S17 |

## Supplemental Figures

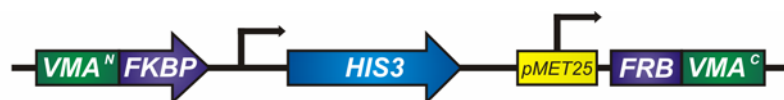

TGCTTTGCCAAGGGTACCAATGTTTTAATGGCGGATGGGTCTATTGAATGTATTGAAAACATTGA  
 GGTGGTAATAAGGTCATGGGTAAAGATGGCAGACCTCGTGAGGTAATTAAATTGCCAGAGG  
 AAGAGAACTATGTACAGCGTCGTGCAGAAAAGTCAGCACAGAGCCACAAAAGTGACTCAA  
 GTCGTGAAGTGCCAGAATTACTCAAGTTTACGTGTAATGCGACCCATGAGTTGGTTGTTAGAAC  
 ACCTCGTAGTGCCGCCGTTTGTCTCGTACCATTAAAGGTGTCGAATATTTGAAGTTATTACTTT  
 TGAGATGGGCCCCAAAAGAAAGCCCCGACGGTAGAATTGTTGAGCTTGTCAAGGAAGTTTCAAA  
 GAGCTACCCAATATCTGAGGGGCTGAGAGAGCCAACGAATTAGTAGAATCCTATAGAAAAGGC  
 TTCAATAAAGCTTATTTTGAAGTGGACTATTGAGGCCAGAGATCTTCTCTGTTGGGTTCCCATG  
 TTCTGTAAGCTACCTACCAGACTTACGCTCCAATTCTTTATTCTAGAAAACACGGCAACGGGAA  
 CGGCACTAGAGGAGTGCAGGTGGAACCATCTCCCCAGGAGACGGGCGCACCTTCCCCAAGC  
 GCGGCCAGACCTCGGTGGTGCCTACACCGGGATGCTTGAAGATGGAAGAAATTTGATTCTT  
 CCGGGACAGAAAACAGCCCTTTAAGTTTATGCTAGGCAAGCAGGAGGTGATCCGAGGCTGG  
 GAAGAAGGGGTTGCCAGATGAGTGTGGGTGAGAGAGCCAACTGACTATATCTCCAGATTAT  
 GCCTATGGTGCCACTGGGCACCCAGGCATCATCCACCACATGCCACTCTCGTCTTCGATGTG  
 GAGCTTCTAAAAGTGGAACTAGTTATTAACGTACGCTGCAGGTGCAGCGATCCCCGGGTTAAT  
 TAAGGCGCGCCAGATCTGTTTAGCTTGCCTCGTCCCGCGGGTCACCCGGCCAGCGACATG  
 GAGGCCAGAAATACCTCCTTGACAGTCTTGACGTGCGCAGCTCAGGGGCATGATGTGACTGT  
 CGCCCGTACATTTAGCCATACATCCCATGTATAATCATTTGCATCCATACATTTTATGAGCCGC  
 ACGGCGCGAAGCAAAAATTACGGCTCTCGCTGCAGACCTGCGAGCAGGGAACCGCTCCCT  
 CACAGACGCGTTGAATTGTCACCGCGCGCCCTGTAGAGAAATATAAAGGTTAGGATT  
 GCCACTGAGGTTCTTCTTATATCTTCTTTAAATCTTGCTAGGATACAGTTCTCACATCAC  
 ATCCGAACATAAACACACCTAGGCTAGGAGGGCTTTTGTAGAAAAGAAATACGAACGAACGAAA  
 ATCAGCGTTGCCATCGCTTTGGACAAAGCTCCCTTACCTGAAGAGTGAATTTTATGATGAAC  
 TTATAACTTCCAAGCATGCAACCAAAAGGGAAGCAAGTAATCCAAGTAGACACGGGAATTG  
 GATTCTTGGATCATGTATCATGCACTGGCTAAACATGCAGGCTGGAGCTTACGACTTTACTCA  
 AGAGGTGATTAATCATCGATGATCATCACTGCAGAAGATACTGCTATTGCACTTGGTATTGC  
 ATTCAGCAGGCTATGGGTAACCTTGGCGGCTTAAAGATTGGACATGCTTATTGTCCACTTG  
 ACGAAGCTCTTTCTAGAAGCGTAGTTGACTTGTGGGACGGCCCTATGCTGTATCGATTGGG  
 ATTAAGCGTGAAAAGGTTGGGGAATTGCTGTGAAATGATCCCTCACTTACTATATTCCTTTT  
 CGGTAGCAGCTGGAATTACTTTGCATGTTACCTGCTTATATGGTAGTAATGACCATCATCGTGT  
 GAAAGCGCTTTTAAATCTCTGGCTGTTGCCATGCGCGCGGCTACTAGTCTTACTGGAAGTCTG  
 AAGTCCCAAGCAGCAAGGGAGTGTGTAAGAGTACTGACAATAAAGATTCTGTTTCAAG  
 AACTGTGCTATTGTATAGTTTTTTTATATTGTAGTTGTTCTATTTTAAATCAAATGTTAGCGTGA  
 ATTTTCTTTCGCTCGACATCATCTGCCAGATGCGAAGTTAAGTGCAGAAAGTAATATCATG  
 CGTCAATCGTATGTAATGCTGGTGCCTATCTGCTGCTGATTGCTACTAAGCGCCCATCCAG  
 TTAAACGAGCTCGAATTCATCGATCAAAGCTGGAGCTCGGATGCAAGGGGTTGCAATCCCTTA  
 GCTCTCATTTATTTTGTCTTTTCTCTTGAAGTGCATGATCGCAAAATGGCAAATGGCAGCTGA  
 AGCTGTGATATTGGGGAAGTGTGGTGGTTGGCAAATGACTAATTAAGTTAGTCAAGGCGCCAT  
 CCTCATGAAAAGTGTGTAACATAATAACCGAAGTGTGAAAAGGTGGCACCTTGTCCAATTGAA  
 CACGCTCGATGAAAAAATAAGATATATAAGGTTAAGTAAAGCGTCTGTTAGAAAGGAAGTTT  
 TTGCTTTTCTGCTCTCTTGTCTTTTCTTCTTACTACTTCTTCTGCTGTAATACAGGGTCTGCA  
 GATAGATACAATTCTATTACCCCATCCCATCTAGAACTAGTGGATCCCCGGGCTGCAGGAA  
 TTCGATATCAAGCTTACCATGGCTTCTAGAATCCTCTGGCATGAGATGTGGCATGAAGGCCTGG  
 AAGAGGCATCTGTTTGTACTTTGGGGAAGGAACGTGAAAGGCATGTTTGAAGTGTGGAGC  
 CCTTGCATGCTATGATGGAACGGGGCCCCAGACTCTGAAGGAAACATCCTTTAATCAGGCCTA  
 TGGTCGAGATTAAATGGAGGCCCAAGAGTGGTGCAGGAAGTACATGAAATCAGGGAATGTCAA  
 GGACCTCCTCCAAGCCTGGACCTTATTATCATGTGTTCCGACGAATCTCAAAGACTAGTGTT  
 TTGCTTAACGTTCTTTCGAAGTGTGCCGGCTCTAAAAAATTCAGGCCTGCTCCCGCCGCTGCTT  
 TTGCAGTGTGAGTGCAGCGGATTTTATTTGAGTTACAAGAATTGAAGGAAGACGATTATTATGG  
 GATTACTTTATCTGATGATTCTGATCATCAGTTTTTGTGTTGCCAACCAAGGTTGCTGTCACAATTG  
 CGACGAGAAGGAGGACGGATCCAGATCTCATCACCATCACCATCACTAA

**Figure S1. DNA-sequence of the CPS cassette**

The CPS cassette (3207 bp from position 1 of Int<sup>N</sup> to position +1 of Int<sup>C</sup>) is encoded in the template vector pTS13.

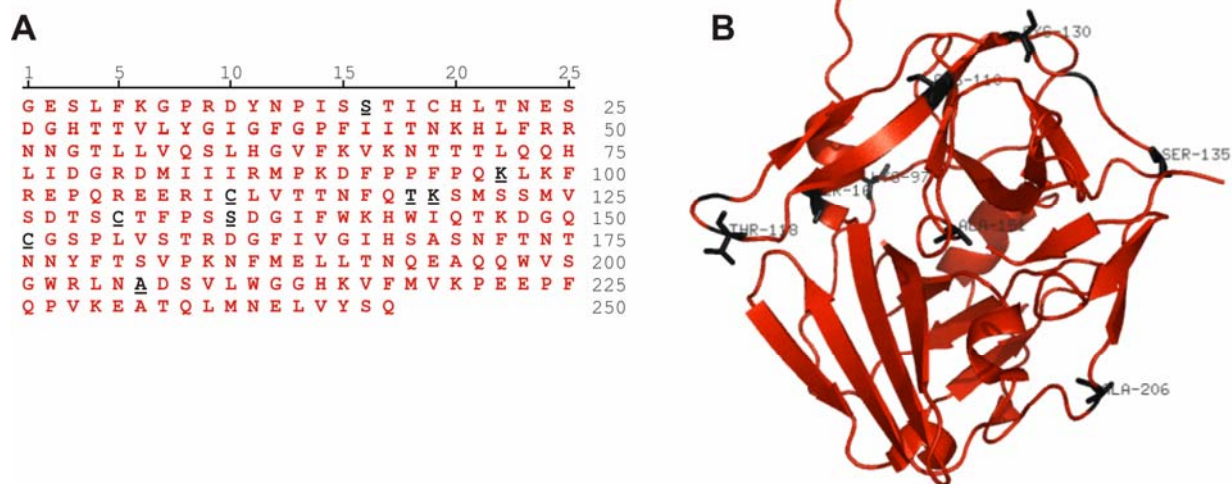

**Figure S2. Positions of integration of the CPS cassette into the TEV protease**

(A) The primary amino acid sequence of the TEV protease used in these experiments (TEV S219V)<sup>1</sup> is shown in red. Amino acids in black and underlined represent the positions at which the CPS intein cassette was integrated.

(B) Crystal structure of the TEV C151A mutant (PDB ID: 1Q31)<sup>2</sup> with the CPS cassette integration insertion positions highlighted. The figure was generated using PyMOL.

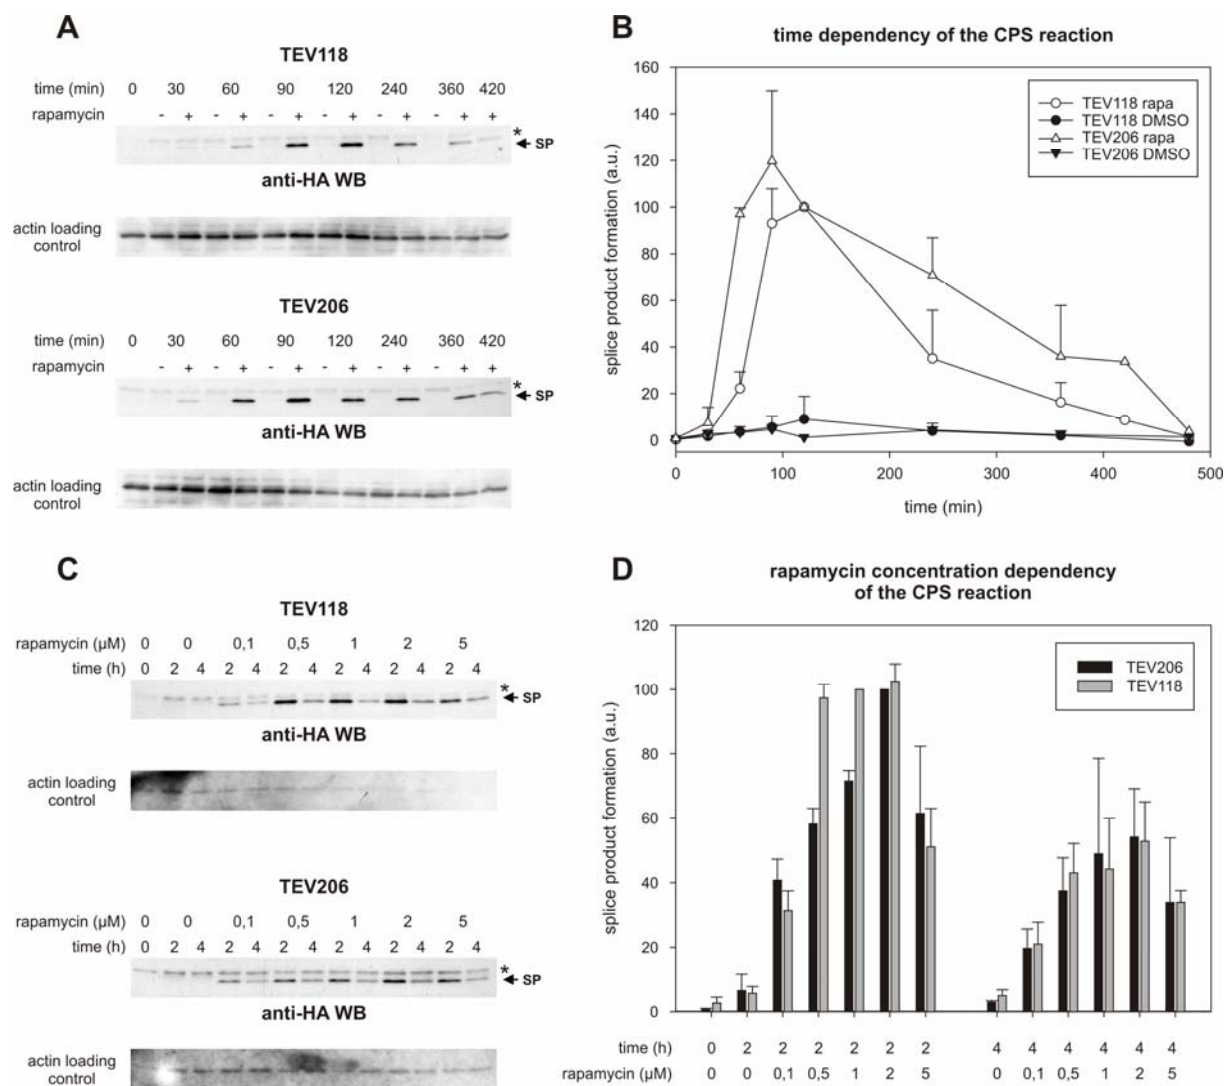

**Figure S3. Influence of the incubation time and concentration of the small molecule on the protein *trans*-splicing reaction**

(A) Time dependent formation of splice product (SP) in the presence or absence of 2  $\mu$ M rapamycin.

(B) Normalized time dependent analysis of the individually evaluated splice product formation of split TEV 118 and 206 based upon the densitometric analysis of the splice product band.

(C) Analysis of the splice product (SP) formation at different rapamycin concentrations and for two different time points.

(D) Densitometric analysis of the dose-dependent CPS as shown in c).

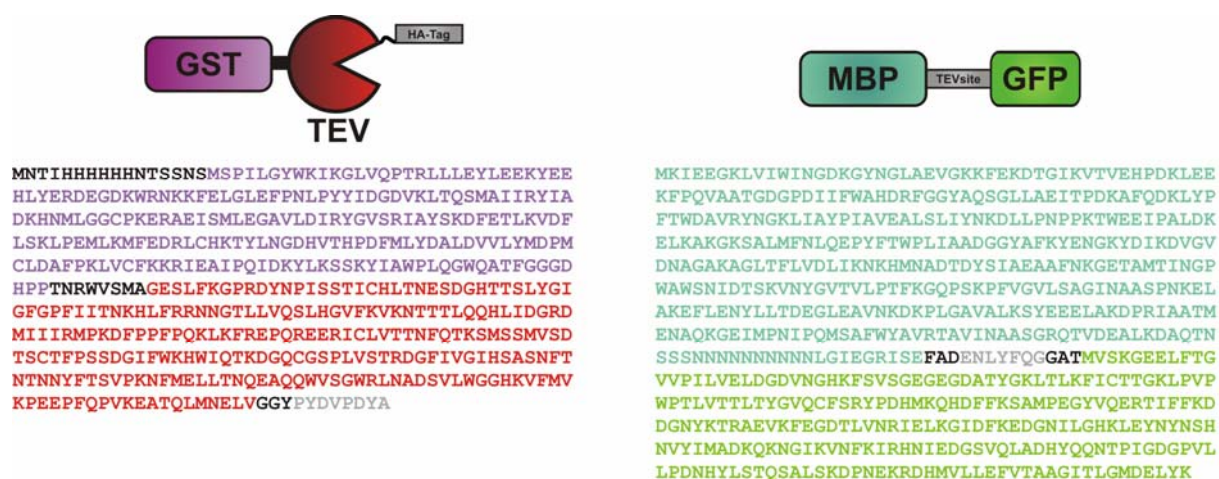

**Figure S4: Amino acid sequence of the TEV construct and reporter protein**

Schematic representation and amino acid sequence of GST-TEV (pTS168) and MBP-TEVsite-EGFP (pTS169).

## Experimental Procedures

### Small molecules

Rapamycin was purchased from LC Laboratories and was stored in a 1 mM or 100  $\mu$ M stock solution in DMSO at  $-20^{\circ}\text{C}$ . The rapalog AP23102 was kindly provided by ARIAD Pharmaceuticals and a 1 mM stock solution in ethanol was stored at  $-20^{\circ}\text{C}$ .

### Western Blots

For Western Blots from whole cell extracts of yeasts the ECL Kit (GE Healthcare) with a 1:4000 dilution of the secondary antibody was used according to the manufacturer's recommendations. The dilutions of the primary antibodies were as follows: anti-His (Qiagen) 1:2000, anti-GST (Sigma Aldrich) 1:1000, anti-GFP (Covance) 1:4000, anti-HA (Covance) 1:1000, anti-MBP (Fermentas) 1:10000.

All stripped Western Blots were reincubated with the anti-Actin sc-1616 (Santa Cruz Biotechnology) antibody in a 1:500 dilution. The secondary antibody was used in a 1:40000 dilution and subsequently the Western Blot was performed with the ECL Advanced Kit (GE Healthcare) to the manufacturer's recommendations.

### General yeast procedures

All *S. cerevisiae* strains were grown at  $30^{\circ}\text{C}$  either in YPD medium or in SD medium lacking the amino acids required for genetic selection of auxotrophic markers.<sup>3</sup> For the SD medium, methionine was used at a concentration of 150  $\mu$ M to reduce the expression level of the *MET25* promoter.<sup>4</sup> Transformation of yeast was done following a LiAc protocol.<sup>5, 6</sup> Plasmids and genomic DNA were isolated by a glass bead assisted DNA/RNA phenol-chloroform extraction protocol.<sup>3</sup> For the preparation of whole cell protein extracts, always the same amount of cells were centrifuged (1 ml of an  $\text{OD}_{600} = 1.0$ ) and the proteins were



prepared using trichloroacetic acid (TCA) precipitation and resuspension in HU sample buffer containing 8M urea.<sup>7</sup>

### **Generation of a rapamycin-resistant yeast strain**

We generated the *S. cerevisiae* strain TS302 which is based on the W303 strain with two additional mutations in *tor2-1* and *FPR1* (see Table S1). The *tor2-1* mutation was introduced by transformation of W303 with the PCR-product obtained by using the primers oTS25 and oTS26 and genomic DNA of the SBFB4 strain,<sup>8</sup> kindly provided by Pete Belshaw, as a template, followed by selection on YPD-medium plates containing 0.1 µg/ml rapamycin. The *FPR1* gene was deleted by genomic insertion of the *HIS3* marker cassette amplified by PCR from the plasmid pFA6a-HIS3MX6<sup>9</sup> with the primers oTS140 and oTS141.

### **Genetic insertion of the CPS intein cassette into target genes**

For the integration of the CPS cassette into the target genes by homologous recombination a yeast strain ( $\Delta$ VMA) lacking the *TFPI* gene (Euroscarf accession number: Y03883) was used (see Table S1). The CPS cassette is encoded on plasmid pTS13 and its gene organization and full DNA sequence is given in Figure S1. To insert the cassette at the C-terminus of MBP, the  $\Delta$ VMA strain was first transformed with the recipient plasmid encoding the target gene (pTS11; 2µ origin). The CPS cassette encoding an additional His<sub>6</sub>-tag C-extein sequence (Figure S1) was amplified by PCR using oligonucleotides oTS13 and oTS14 and pTS13 as the template. The  $\Delta$ VMA-pTS11 strain was then transformed with the purified PCR product and transformants were selected by the *HIS3* marker gene in the cassette.<sup>10</sup> Isolated plasmids were confirmed for the correct integration by DNA-sequencing. Of these, one (pTS15) was used for further experiments.

For the cassette integrations into different positions of the GST-TEV encoding gene, the  $\Delta$ VMA strain was first transformed with the respective plasmid (pTS55, 2µ origin). The CPS cassette was then



amplified by PCR and inserted as described above using a specific pair of PCR primers for each position (Table S4). The candidate integration plasmids from the selected transformants were isolated by phenol/chloroform extraction. To avoid a potential mixture of plasmids, the isolated plasmids were retransformed into the same strain, the selection was repeated, and plasmids were again isolated from colonies grown in this second round. After confirmation of the correct cassette integration by DNA-sequencing, the final TEV-CPS integration plasmids (pTS89, pTS90, pTS95, pTS99, pTS110, pTS111, pTS114, pTS118, and pTS119) were obtained.

### **Identification and modification of the active TEV-CPS variants**

The rapamycin resistant strain (TS302; see Table S1) was co-transformed with either one of the TEV-CPS integration plasmids or a control plasmid (negative = pTS35, positive = pTS55), respectively, and the reporter plasmid encoding MBP-TEVsite-EGFP (pTS69). Selection was performed according to genetic markers of the plasmids. After inoculation from a plate the strains carrying the different TEV-CPS integration plasmids were grown over night in medium containing either 1  $\mu$ M rapamycin or 0.1 % (v/v) DMSO. At the following day whole cell extracts were prepared and analysed via Western Blot.

To generate the final TEV118-CPS (pTS165) and TEV206-CPS (pTS170) constructs, the coding region of the active insertion positions 118 (pTS90) and 206 (pTS110) was amplified with the primers oTS186 and oTS187 and subsequently cloned into p424-TDH. In this PCR- amplification step the HA-tag sequence was added to the 3' end of the C-terminal TEV gene fragment. In the same step, the three terminal amino acids of TEV were deleted to block intramolecular cleavage of the HA-tag. The corresponding C1A splice mutants 118 (pTS184) and 206 (pTS187) were generated via site-directed mutagenesis using the primer pairs oTS182 & oTS183 (template pTS165) and oTS184 & oTS185 (template pTS170). The positive control (pTS165, see Figure S4) coding for GST-TEV-HA was amplified from the plasmid pTS55 using again the primers oTS186 and oTS187. The reporter plasmid coding for MBP-TEVsite-EGFP was derived from pTS69 cloned into the ARS/CEN origin plasmid. In the following growth experiments rapamycin resistant strain (TS302) was cotransfected with two

plasmids, one of which was in all cases reporter plasmid (pTS169, see Figure S4) encoding MBP-TEVsite-EGFP. As the negative control the p424-TDH plasmid was used.

In the growth experiments of the TEV118-CPS and TEV206-CPS constructs over-night cultures grown in SD medium were used to inoculate 10 mL of the same medium to an  $OD_{600} = 0.3$ . These cultures were grown until they reached exponential growth phase ( $OD_{600} \sim 0.5$ ), which took about 3 h. Then each culture was split into 2 flasks and further incubated at the same temperature with either the depicted concentrations of rapamycin or just the same volume of DMSO. At the indicated time points aliquots were removed and whole cell extracts were prepared.

### **TEV-CPS mediated manipulation of EGFP localization and analysis by fluorescence microscopy**

To observe the localization of EGFP in yeast cells the rapamycin resistant strain SBFB4 was cotransformed with a plasmid encoding STE2-TEVsite-EGFP (pTS229) and the plasmids encoding the split TEV118-CPS or TEV206-CPS (pTS165, pTS170). For comparison, the plasmids encoding the respective splice mutants (pTS184, pTS187), the positive (pTS168) and negative (p424-TDH) controls, were cotransformed.

Following inoculation in 10 ml fresh medium to an  $OD_{600} = 0.15$  from an over night culture these cultures were split and grown for eight hours either in the presence of 2  $\mu$ M rapamycin or 0.2 % DMSO (v/v). Afterwards the cells were used for the preparation of whole cell extracts and also for live cell fluorescence microscopy experiments. For the latter procedure, the cells were pelleted by centrifugation, washed once with PBS, and resuspended in 200  $\mu$ l of PBS containing 2% glucose to an  $OD_{600} = 0.5$ . Half of this solution was added for cell immobilization to MatTek dishes that were coated with concanavalin A according to the following procedure: The glass surface of the MatTek dishes were briefly incubated with 75  $\mu$ l of 1M NaOH by pipetting the solution three times up and down. The same was subsequently performed for 75  $\mu$ l of pure ethanol and was followed by two washing steps with H<sub>2</sub>O. Then the dishes were incubated for three hours with 100  $\mu$ l of 1% concanavalin A (Carl Roth) in PBS solution. After removal of the solution the dishes were washed twice with PBS and the yeast samples were placed onto

them. The dishes were mounted on a Leica TCS SP5 confocal microscope with a HCX PL APO 63x oil objective. For excitation at 488 nm an argon laser was used and EGFP fluorescence was detected from 504 to 530 nm. At least 200 cells per experiment were manually analysed for the localization of EGFP for each strain carrying different plasmids and grouped into i) predominant membrane localization, ii) predominant cytosolic localization, and iii) predominant vacuolar localization.

**Table S1. *S. cerevisiae* strains used in this study**

| name  | reference                                         | genotype                                                                                                                         |
|-------|---------------------------------------------------|----------------------------------------------------------------------------------------------------------------------------------|
| ΔVMA  | Y03883<br>(EUROSCARF)                             | <i>MATα; his3Δ1; leu2Δ0; met15Δ0; ura3Δ0; tfp1Δ::kanMX4</i>                                                                      |
| SBFB4 | <sup>8</sup>                                      | <i>MATα; trp1-901; leu2-3,112; ura3-52; his3-200; gal4Δ; gal80Δ; GAL2-ADE2; LYS2::GAL1-HIS3; met2:: GAL7-lacZ; tor2-1; Δfpr1</i> |
| TS302 | this work; based on the W303 strain <sup>11</sup> | <i>MATα, ura3-1, ade2-1, trp1-1, his3-11, leu2-3, tor2-1, fpr1Δ::HIS3MX6</i>                                                     |
| W303  | <sup>11</sup>                                     | <i>MATα, ura3-1, ade2-1, trp1-1, his3-11, leu2-3</i>                                                                             |

Table S2. List of generated plasmids

| Plasmid name | Coding region                                                                | Vector used for generation                 | Insert/template DNA                                    | Primer used                                                                   | Generated via restriction sites / integration / fusion PCR                                                  |
|--------------|------------------------------------------------------------------------------|--------------------------------------------|--------------------------------------------------------|-------------------------------------------------------------------------------|-------------------------------------------------------------------------------------------------------------|
| pTS8         | <i>FRB- C'VMA-His<sub>6</sub></i>                                            | p416-MET25                                 | pEB3 <sup>12</sup>                                     | -                                                                             | restriction sites ( <i>Hind</i> III and <i>Xho</i> I )                                                      |
| pTS11        | <i>MBP</i>                                                                   | pYES2 (Invitrogen)                         | pHM45 <sup>12</sup>                                    | -                                                                             | restriction sites ( <i>Hind</i> III and <i>Xho</i> I )                                                      |
| pTS13        | <i>N'VMA-FKBP_HIS3_pMET25-FRB-C'VMA-His<sub>6</sub></i>                      | pBluescript KS- (GenBank Acc. No.: X52329) | pHM41, <sup>12</sup> pFA6a-HIS3MX6, <sup>9</sup> pTS08 | oTS007 & oTS008, oTS005 & oTS006, oTS009 & oTS010; fusion PCR = oTS007&oTS010 | fusion PCR <sup>13</sup> , restriction sites ( <i>Nhe</i> I and <i>Xho</i> I )                              |
| pTS15        | <i>MBP-N'VMA-FKBP_HIS3_FRB-C'VMA-His<sub>6</sub></i>                         | pTS11 (pYES2)                              | pTS13 (CPS cassette)                                   | oTS13 & oTS14                                                                 | integration                                                                                                 |
| pTS34        | <i>MBP-TEV(site)-EGFP</i>                                                    | pHM45 <sup>12</sup>                        | pEGFP-N1 (Clontech)                                    | oTS75 & oTS76                                                                 | restriction sites ( <i>Eco</i> RI and <i>Hind</i> III )                                                     |
| pTS35        | none ( <i>GAL1</i> promoter)                                                 | p426-GPD                                   | pYES2 ( <i>GAL1</i> promoter)                          | oTS71 & oTS72                                                                 | restriction sites ( <i>Sac</i> I and <i>Spe</i> I )                                                         |
| pTS40        | <i>MBP-TEVsite-EGFP</i>                                                      | p425-TDH                                   | pTS34                                                  | oTS77 & oTS76                                                                 | restriction sites ( <i>Pst</i> I and <i>Spe</i> I )                                                         |
| pTS55        | <i>His<sub>6</sub>-GST-TEV(S219V)</i>                                        | pTS35 (p426-GPD)                           | pGAT_TEVS219V*                                         | -                                                                             | restriction sites ( <i>Spe</i> I and <i>Xho</i> I ; <i>Xba</i> I instead of <i>Spe</i> I in pGAT_TEVS219V*) |
| pTS68        | <i>MBP-TEVsite-EGFP</i>                                                      | pTS34                                      | pEGFP-N1 (Clontech)                                    | oTS97 & oTS98                                                                 | restriction sites ( <i>Eco</i> RI and <i>Hind</i> III )                                                     |
| pTS69        | <i>MBP-TEVsite-EGFP</i>                                                      | pTS40 (p425-TDH)                           | pTS68                                                  | -                                                                             | restriction sites ( <i>Nde</i> I and <i>Hind</i> III )                                                      |
| pTS89        | <i>His<sub>6</sub>-GST-N'TEVCys151-N'VMA-FKBP_HIS3_FRB-C'VMA-C'TEVCys151</i> | pTS55 (p426-GPD)                           | pTS13 (CPS cassette)                                   | oTS91 & oTS92                                                                 | integration                                                                                                 |
| pTS90        | <i>His<sub>6</sub>-GST-N'TEV118-N'VMA-FKBP_HIS3_FRB-C'VMA-C'TEV118</i>       | pTS55 (p426-GPD)                           | pTS13 (CPS cassette)                                   | oTS95 & oTS96                                                                 | integration                                                                                                 |
| pTS95        | <i>His<sub>6</sub>-GST-N'TEV130-N'VMA-FKBP_HIS3_FRB-C'VMA-C'TEV130</i>       | pTS55 (p426-GPD)                           | pTS13 (CPS cassette)                                   | oTS93 & oTS94                                                                 | integration                                                                                                 |
| pTS99        | <i>His<sub>6</sub>-GST-N'TEV97-N'VMA-FKBP_HIS3_FRB-C'VMA-C'TEV97</i>         | pTS55 (p426-GPD)                           | pTS13 (CPS cassette)                                   | oTS128 & oTS129                                                               | integration                                                                                                 |
| pTS110       | <i>His<sub>6</sub>-GST-N'TEV206-N'VMA-FKBP_HIS3_FRB-C'VMA-C'TEV206</i>       | pTS55 (p426-GPD)                           | pTS13 (CPS cassette)                                   | oTS124 & oTS125                                                               | integration                                                                                                 |
| pTS111       | <i>His<sub>6</sub>-GST-N'TEV16-N'VMA-FKBP_HIS3_FRB-C'VMA-C'TEV16</i>         | pTS55 (p426-GPD)                           | pTS13 (CPS cassette)                                   | oTS130 & oTS131                                                               | integration                                                                                                 |

| Plasmid name | Coding region                                                                   | Vector used for generation | Insert/template DNA                     | Primer used     | Generated via restriction sites / integration / fusion PCR                                                                                                     |
|--------------|---------------------------------------------------------------------------------|----------------------------|-----------------------------------------|-----------------|----------------------------------------------------------------------------------------------------------------------------------------------------------------|
| pTS114       | <i>His<sub>6</sub>-GST-N'TEV135-N'VMA-FKBP_HIS3_FRB-C'VMA-C'TEV135</i>          | pTS55 (p426-GPD)           | pTS13 (CPS cassette)                    | oTS126 & oTS127 | integration                                                                                                                                                    |
| pTS118       | <i>His<sub>6</sub>-GST-N'TEV110(Ile)-N'VMA-FKBP_HIS3_FRB-C'VMA-C'TEV110</i>     | pTS55 (p426-GPD)           | pTS13 (CPS cassette)                    | oTS121 & oTS122 | integration                                                                                                                                                    |
| pTS119       | <i>His<sub>6</sub>-GST-N'TEV110(Ala)-N'VMA-FKBP_HIS3_FRB-C'VMA-C'TEV110</i>     | pTS55 (p426-GPD)           | pTS13 (CPS cassette)                    | oTS123 & oTS122 | integration                                                                                                                                                    |
| pTS142       | <i>FRB-C'VMA-C'TEV118-HA</i>                                                    | p426-GPD                   | pTS90                                   | oTS160 & oTS161 | restriction sites ( <i>Bam</i> HI and <i>Xho</i> I )                                                                                                           |
| pTS144       | <i>FRB-C'VMA-C'TEV206-HA</i>                                                    | p426-GPD                   | pTS110                                  | oTS160 & oTS161 | restriction sites ( <i>Bam</i> HI and <i>Xho</i> I )                                                                                                           |
| pTS165       | <i>His<sub>6</sub>-GST-N'TEV118-N'VMA-FKBP_HIS3_FRB-C'VMA-C'TEV118-HA</i>       | p424-TDH                   | pTS90                                   | oTS186 & oTS187 | restriction sites ( <i>Spe</i> I and <i>Xho</i> I; <i>Nhe</i> I instead of <i>Spe</i> I in PCR of pTS90 )                                                      |
| pTS168       | <i>His<sub>6</sub>-GST-TEV-HA</i>                                               | p424-TDH                   | pGAT_TEVS219V*                          | oTS186 & oTS187 | restriction sites ( <i>Spe</i> I and <i>Xho</i> I; <i>Nhe</i> I instead of <i>Spe</i> I in PCR of pGAT_TEVS219V )                                              |
| pTS169       | <i>pTDH-MBP-TEVsite-EGFP</i>                                                    | p415-MET                   | pTS69; pTS69                            | -               | restriction sites (p415-MET: <i>Sac</i> I and <i>Xho</i> I; pTS69: <i>Sac</i> I and <i>Nde</i> I; pTS69: <i>Nde</i> I and <i>Xho</i> I)                        |
| pTS170       | <i>His<sub>6</sub>-GST-N'TEV206-N'VMA-FKBP_HIS3_FRB-C'VMA-C'TEV206-HA</i>       | p424-TDH                   | pTS110                                  | oTS186 & oTS187 | restriction sites ( <i>Spe</i> I and <i>Xho</i> I; <i>Nhe</i> I instead of <i>Spe</i> I in PCR of pTS110 )                                                     |
| pTS184       | <i>His<sub>6</sub>-GST-N'TEV118-N'VMA(AFAK)-FKBP_HIS3_FRB-C'VMA-C'TEV118-HA</i> | p424-TDH                   | pTS165                                  | oTS182 & oTS183 | -                                                                                                                                                              |
| pTS187       | <i>His<sub>6</sub>-GST-N'TEV206-N'VMA(AFAK)-FKBP_HIS3_FRB-C'VMA-C'TEV206-HA</i> | p424-TDH                   | pTS170                                  | oTS184 & oTS185 | -                                                                                                                                                              |
| pTS201       | <i>ssTM-PARPD-TEVsite-EGFP</i>                                                  | p415-MET                   | ssTM-PARPD-GAL4**, <sup>14</sup> pTS169 | oTS197 & oTS204 | restriction sites (p415-MET: <i>Spe</i> I and <i>Hind</i> III; PCR ssTM-PARPD-GAL4: <i>Spe</i> I and <i>Eco</i> RI; pTS169: <i>Eco</i> RI and <i>Hind</i> III) |
| pTS229       | <i>STE2-TEVsite-EGFP</i>                                                        | pTS201 (p415-MET)          | STE2 (chromosomal DNA SBFB4)            | oTS221 & oTS222 | restriction sites ( <i>Spe</i> I and <i>Nde</i> I)                                                                                                             |

The yeast vectors (p42X and p41X based)<sup>4, 15</sup> were a kind gift of Roland Lill.  
 \*= The TEV protease containing plasmid was a kind gift of Kirill Alexandrov.  
 \*\*= The ssTM-PARPD-GAL4 plasmid was kindly provided by Christian Haass.

**Table S3. List of primers**

| primer name | description / template                     | sequence (5' to 3')                                                   |
|-------------|--------------------------------------------|-----------------------------------------------------------------------|
| oTS005      | HIS3 marker for CPS cassette FP            | GTGGAGCTTCTAAAACTGGAACTAGTTATTAACGTACGCTGCAGGTCGAC                    |
| oTS006      | HIS3 marker for CPS cassette RP            | CGAACCCTTGCATCCGAGCTCCAGCTTTTGATCGATGAATTCGAGCTCG                     |
| oTS007      | VMA-FKBP FP                                | ATATGCTAGCGAATTCCTTAAGGGGTGCTTTGC                                     |
| oTS008      | VMA-FKBP RP                                | TTAATAACTAGTTTCCAGTTTTAGAAG                                           |
| oTS009      | pMET25-FRB-C'VMA-His <sub>6</sub> FP       | CAAAAGCTGGAGCTCGGATGC                                                 |
| oTS010      | pMET25-FRB-C'VMA-His <sub>6</sub> RP       | CATGACTCGAGTTAGTGATGGTGATG                                            |
| oTS013      | integration CPS cassette in pTS11 FP       | ACAATAACAACAACCTCGGGATCGAGGGAAGGATTTTCAGAATTCCTTAAGGGGTGCTTTG         |
| oTS014      | integration CPS cassette in pTS11 RP       | GAGTTAGTGATGGTGATGGTGATGAGATCTGGATCCGTCCTCTCTCGTCGCAATTGTG            |
| oTS071      | pGAL1 FP                                   | ATAGAGCTCACGGATTAGAAGCCGCCGAGC                                        |
| oTS072      | pGAL1 RP                                   | ATAACTAGTGTTTTTCTCCTTGACGTTAAAG                                       |
| oTS075      | TEVsite-EGFP FP                            | ATAGAATTCGAGAATCTTTATTTTCAGGGCCGGGATCCACCGGTGCGCCACC                  |
| oTS076      | EGFP-HIS <sub>6</sub> RP                   | ATAAAGCTTTTAGTGATGGTGATGGTGATGCTGCAGCGATCCCTTGTACAGCTCGTCCATGCC       |
| oTS077      | MBP FP                                     | ATAACTAGTAGCATATGAAAATCGAAGAAG                                        |
| oTS091      | integration CPS cassette in TEV151 FP      | TATTCTGGAAGCATTGGATTCAAACCAAGGATGGGCAGTGCTTTGCCAAGGGTACCAA            |
| oTS092      | integration CPS cassette in TEV151 RP      | ATGAACCCATCTCTAGTTGATACTAATGGACTGCCACAATTGTGCACGACAACCTGG             |
| oTS093      | integration CPS cassette in TEV130 FP      | AAACTAAGAGCATGTCTAGCATGGTGTCAGACACTAGTTGCTTTGCCAAGGGTACCAA            |
| oTS094      | integration CPS cassette in TEV130 RP      | ATGCTTCCAGAATATGCCATCAGATGAAGGGAATGTGCAATTGTGCACGACAACCTGG            |
| oTS095      | integration CPS cassette in TEV118 FP      | AGGGAAGAGCGCATATGTCTTGTGACAACCAACTTCCAAACTGTCTGGGTGCTTTGCCAAGGGTACCAA |
| oTS096      | integration CPS cassette in TEV118 RP      | AATGTGCAACTAGTGCTGACACCATGCTAGACATGCTCTTTTCTCCGCAATTGTGCACGACAACCTGG  |
| oTS097      | TEVsite-EGFP FP                            | ATAGAATTCGCTGATGAGAATCTTTATTTTCAGGGCGGGGCCACCATGGTGAGCAAGGG           |
| oTS098      | EGFP RP                                    | ATAAAGCTTTTACTTGTACAGCTCGTCCA                                         |
| oTS121      | integration CPS cassette in TEV110(Ile) FP | AAAGCTGAAATTTAGAGAGCCACAAAGGGAAGAGCGCATATGCTTTGCCAAGGGTACCAA          |
| oTS122      | integration CPS cassette in TEV110 RP      | TAGACATGCTCTTAGTTTGGAAGTTGGTTGTACAAGACAATTGTGCACGACAACCTGG            |
| oTS123      | integration CPS cassette in TEV110(Ala) FP | CAAAAGCTGAAATTTAGAGAGCCACAAAGGGAAGAGCGCGCATGCTTTGCCAAGGGTACCAA        |
| oTS124      | integration CPS cassette in TEV206 FP      | AAATCAGGAGGCGCAGCAGTGGGTAGTGGTTGGCGATTAGGTGCTTTGCCAAGGGTACCAA         |
| oTS125      | integration CPS cassette in TEV206 RP      | TCACCATGAAAACCTTTATGGCTCCCCACAATACTGAGTCGCAATTGTGCACGACAACCTGG        |
| oTS126      | integration CPS cassette in TEV135 FP      | GTCTAGCATGGTGTCAGACACTAGTTGCACATTCCCTTCATGCTTTGCCAAGGGTACCAA          |
| oTS127      | integration CPS cassette in TEV135 RP      | CATCCTTGGTTTGAATCCAATGCTTCCAGAATATGCCATCGCAATTGTGCACGACAACCTGG        |
| oTS128      | integration CPS cassette in TEV97 FP       | AATTATTCGCATGCCTAAGGATTTCCACCATTTCCTCAATGCTTTGCCAAGGGTACCAA           |
| oTS129      | integration CPS cassette in TEV97 RP       | GACATATGCGCTCTTCCCTTGTGGCTCTCTAAATTTTCAGGCAAATTGTGCACGACAACCTGG       |
| oTS130      | integration CPS cassette in TEV16 FP       | AAGCTTGTTTAAAGGGACCACGTGATTACAACCCGATATCGTGCTTTGCCAAGGGTACCAA         |
| oTS131      | integration CPS cassette in TEV16 RP       | TTGTGTGCCCATCAGATTCATTCGTCAAATGACAAATGGTGCAATTGTGCACGACAACCTGG        |



| primer name | description / template                       | sequence (5' to 3')                                                         |
|-------------|----------------------------------------------|-----------------------------------------------------------------------------|
| oTS160      | FRB FP                                       | ATAGGATCCACCATGGCTTCTAGAATCCTCTGGC                                          |
| oTS161      | C'TEV-HA RP                                  | ATACTCGAGTTATTAGGCGTAATCTGGGACGTCGTATGGGTATC<br>CACCTTGCGAGTACACCAATTCATTC  |
| oTS162      | His <sub>6</sub> -GST-N'TEV118-N'VMA-FKBP FP | ATAGAATTCACCATGAACACCATTTCATCACCATC                                         |
| oTS163      | His <sub>6</sub> -GST-N'TEV118-N'VMA-FKBP RP | ATACTCGAGTTATTAATAACTAGTTTCCAGTTTTAG                                        |
| oTS182      | SDM TEV118 FP                                | CAAACCTGTCGGGGCCTTTGCCAAGGGTACC                                             |
| oTS183      | SDM TEV118 RP                                | GGTACCCTTGCCAAAGGCCCCGACAGTTTG                                              |
| oTS184      | SDM TEV206 FP                                | GTTGGCGATTAGGTGCCTTTGCCAAGGGTAC                                             |
| oTS185      | SDM TEV206 RP                                | GTACCCTTGCCAAAGGCACCTAATCGCCAAC                                             |
| oTS186      | His <sub>6</sub> -GST FP                     | ATAGCTAGCTCCATGAACACCATTTCATCACC                                            |
| oTS187      | C'TEV-HA RP                                  | ATACTCGAGTTATTAGGCGTAATCTGGGACGTCGTATGGGTATC<br>CACCCACCAATTCATTCATGAGTTGAG |
| oTS197      | ssTM-PARPD FP                                | ATAACTAGTGCCATGGAGTTACCTGCACC                                               |
| oTS204      | ssTM-PARPD RP                                | ATAGAATTCATCGCCTTTTCTCTTTCCTTC                                              |
| oTS221      | STE2 FP                                      | ATAACTAGTATGTCTGATGCGGCTCCTTCATTGAG                                         |
| oTS222      | STE2 RP                                      | ATACATATGTAAATTATTATTATCTTCAGTCCAG                                          |

FP: forward primer, RP: reverse primer, SDM: site-directed mutagenesis, and iPCR: inverse PCR.

**Table S4. Primers and plasmids for the integration of the CPS cassette into *GST-TEV***

| TEV protease insertion position (into GST-TEV, pTS55) | Primers used for amplification of the CPS cassette (pTS13) | Resulting integration plasmid |
|-------------------------------------------------------|------------------------------------------------------------|-------------------------------|
| 16                                                    | oTS130 & oTS131                                            | pTS111                        |
| 97                                                    | oTS128 & oTS129                                            | pTS99                         |
| 110 (I)                                               | oTS121 & oTS122                                            | pTS118                        |
| 110 (A)                                               | oTS123 & oTS122                                            | pTS119                        |
| 118                                                   | oTS095 & oTS096                                            | pTS90                         |
| 130                                                   | oTS093 & oTS094                                            | pTS95                         |
| 135                                                   | oTS126 & oTS127                                            | pTS114                        |
| 151                                                   | oTS091 & oTS092                                            | pTS89                         |
| 206                                                   | oTS124 & oTS125                                            | pTS110                        |

## Supplemental References

1. R. B. Kapust, J. Tozser, J. D. Fox, D. E. Anderson, S. Cherry, T. D. Copeland and D. S. Waugh, *Protein engineering*, 2001, **14**, 993-1000.
2. C. M. Nunn, M. Jeeves, M. J. Cliff, G. T. Urquhart, R. R. George, L. H. Chao, Y. Tscuchia and S. Djordjevic, *Journal of molecular biology*, 2005, **350**, 145-155.
3. M. D. Rose, F. Winston and P. Hieter, *Methods in Yeast Genetics: A Laboratory Course Manual*, Cold Spring Harbor Laboratory Press, Cold Spring Harbor, New York, 1990.
4. D. Mumberg, R. Muller and M. Funk, *Nucleic acids research*, 1994, **22**, 5767-5768.
5. D. Gietz, A. St Jean, R. A. Woods and R. H. Schiestl, *Nucleic acids research*, 1992, **20**, 1425.
6. R. H. Schiestl and R. D. Gietz, *Current genetics*, 1989, **16**, 339-346.
7. P. A. Silver, A. Chiang and I. Sadler, *Genes & development*, 1988, **2**, 707-717.
8. B. F. Binkowski, R. A. Miller and P. J. Belshaw, *Chemistry & biology*, 2005, **12**, 847-855.
9. A. Wach, A. Brachat, C. Alberti-Segui, C. Rebischung and P. Philippsen, *Yeast (Chichester, England)*, 1997, **13**, 1065-1075.
10. C. B. Brachmann, A. Davies, G. J. Cost, E. Caputo, J. Li, P. Hieter and J. D. Boeke, *Yeast (Chichester, England)*, 1998, **14**, 115-132.
11. H. Y. Fan, K. K. Cheng and H. L. Klein, *Genetics*, 1996, **142**, 749-759.
12. H. D. Mootz, E. S. Blum, A. B. Tyszkiewicz and T. W. Muir, *Journal of the American Chemical Society*, 2003, **125**, 10561-10569.
13. H. Kuwayama, S. Obara, T. Morio, M. Katoh, H. Urushihara and Y. Tanaka, *Nucleic acids research*, 2002, **30**, E2.
14. H. Steiner, B. Pesold and C. Haass, *FEBS letters*, 1999, **463**, 245-249.
15. D. Mumberg, R. Muller and M. Funk, *Gene*, 1995, **156**, 119-122.
